# Supplementary material
Source: publisher figshare collection journal article supplement (https://brill.figshare.com/articles/dataset/_/1575699)

## COI-based barcoding of Chinese vipers (Reptilia: Squamata: Viperidae)

Qin Liu<sup>1, 2</sup>, Fei Zhu<sup>1, 2</sup>, Guanghui Zhong<sup>1, 3</sup>, Yunyu Wang<sup>4</sup>, Min Fang<sup>1</sup>, Rong Xiao<sup>1</sup>, Yansen Cai<sup>5</sup>, Peng Guo<sup>1</sup>

<sup>1</sup>College of Life Sciences and Food Engineering, Yibin University, Yibin 644007, China

<sup>2</sup>College of Life Sciences, Sichuan University, Chengdu 610064, China

<sup>3</sup>College of Tourism and Urban-Rural Planning, Chengdu University of Technology, Chengdu 610059, China

<sup>4</sup>State Key Laboratory of Genetic Resources and Evolution, Kunming Institute of Zoology, Chinese Academy of Sciences, Kunming, 650223, China

<sup>5</sup>Department of Medical Biology and Genetics, Luzhou Medical College, Luzhou, 646000, China

### Supplementary Material

**Figure S1.** A full COI neighbour-joining tree with uncollapsed clades and geographical localities of Viperidae (K2P distances), with bootstrap support (1000 replicates).

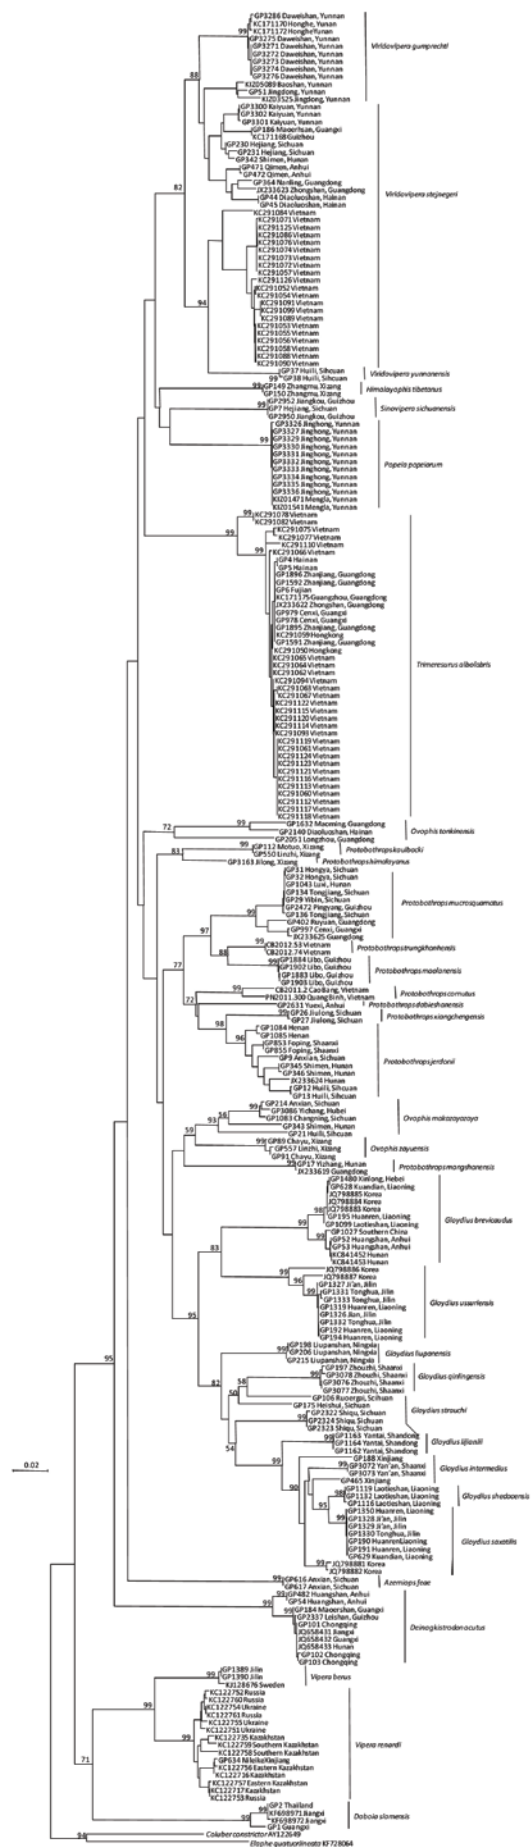

Supplement: Supplementary file 1 [file 1]
