# Supplementary material
Source: publisher figshare collection journal article supplement (https://brill.figshare.com/articles/dataset/_/1575699)
Supplement: Supplementary file 2 [file 1]

## COI-based barcoding of Chinese vipers (Reptilia: Squamata: Viperidae)

Qin Liu<sup>1,2</sup>, Fei Zhu<sup>1,2</sup>, Guanghui Zhong<sup>1,3</sup>, Yunyu Wang<sup>4</sup>, Min Fang<sup>1</sup>, Rong Xiao<sup>1</sup>, Yansen Cai<sup>5</sup>, Peng Guo<sup>1,\*</sup>

<sup>1</sup>College of Life Sciences and Food Engineering, Yibin University, Yibin 644007, China

<sup>2</sup>College of Life Sciences, Sichuan University, Chengdu 610064, China

<sup>3</sup>College of Tourism and Urban-Rural Planning, Chengdu University of Technology, Chengdu 610059, China

<sup>4</sup>State Key Laboratory of Genetic Resources and Evolution, Kunming Institute of Zoology, Chinese Academy of Sciences, Kunming, 650223, China

<sup>5</sup>Department of Medical Biology and Genetics, Luzhou Medical College, Luzhou, 646000, China

### Supplementary Material

**Table S1.** List of specimens with localities. GP: author's personal catalogue; KIZ: Kunming Institute of Zoology, the Chinese Academy of Sciences; IEBR: Institute of Ecology and Biological Resources, Hanoi; ZFMK: Zoologisches Forschungsinstitut und Museum Alexander Koenig, Bonn. # indicates the sequences were retrieved from GenBank.

| Taxa (Species)                | Voucher no.      | Genbank no. | BIN no.      | Locality           |
|-------------------------------|------------------|-------------|--------------|--------------------|
| <i>Azemiops feae</i>          | GP616            | KP403569    | BOLD:ACV0634 | Anxian, Sichuan    |
| <i>Azemiops feae</i>          | GP617            | KP403570    | BOLD:ACV0634 | Anxian, Sichuan    |
| <i>Daboia siamensis</i>       | GP1              | KP403682    | BOLD:AAI9655 | Guangxi            |
| <i>Daboia siamensis</i>       | GP2              | KP403683    | BOLD:AAI9655 | Thailand           |
| <i>Daboia siamensis</i>       | S-04             | KF698971#   | -            | Jiangxi            |
| <i>Daboia siamensis</i>       | S-05             | KF698972#   | -            | Jiangxi            |
| <i>Deinagkistrodon acutus</i> | GP54             | KP403580    | BOLD:AAE7483 | Huangshan, Anhui   |
| <i>Deinagkistrodon acutus</i> | GP101            | KP403581    | BOLD:ACC5654 | Chongqing          |
| <i>Deinagkistrodon acutus</i> | GP102            | KP403582    | BOLD:ACC5654 | Chongqing          |
| <i>Deinagkistrodon acutus</i> | GP103            | KP403583    | BOLD:ACC5654 | Chongqing          |
| <i>Deinagkistrodon acutus</i> | GP184            | KP403584    | BOLD:ACC5654 | Guilin, Guangxi    |
| <i>Deinagkistrodon acutus</i> | GP482            | KP403585    | BOLD:AAE7483 | Huangshan, Anhui   |
| <i>Deinagkistrodon acutus</i> | GP2337           | KP403586    | BOLD:ACC5654 | Leishan, Guizhou   |
| <i>Deinagkistrodon acutus</i> | TP-7             | JQ658431#   | -            | Jiangxi            |
| <i>Deinagkistrodon acutus</i> | TP-8             | JQ658432#   | -            | Guangxi            |
| <i>Deinagkistrodon acutus</i> | TP-13            | JQ658433#   | -            | Hunan              |
| <i>Gloydus brevicaudus</i>    | GP52             | KP403587    | BOLD:ACV0124 | Huangshan, Anhui   |
| <i>Gloydus brevicaudus</i>    | GP53             | KP403588    | BOLD:ACV0124 | Huangshan, Anhui   |
| <i>Gloydus brevicaudus</i>    | GP195            | KP403589    | BOLD:ACB4072 | Huanren, Liaoning  |
| <i>Gloydus brevicaudus</i>    | GP628            | KP403590    | BOLD:ACB4072 | Kuandian, Liaoning |
| <i>Gloydus brevicaudus</i>    | GP1027           | KP403591    | BOLD:ACV0124 | South of China     |
| <i>Gloydus brevicaudus</i>    | GP1099           | KP403592    | BOLD:ACB4072 | Dalian, Liaoning   |
| <i>Gloydus brevicaudus</i>    | GP1480           | KP403593    | BOLD:ACB4072 | Xinlong, Hebei     |
| <i>Gloydus brevicaudus</i>    | NIBRRP0000100264 | JQ798883#   | -            | Sinan-gun,Korea    |
| <i>Gloydus brevicaudus</i>    | NIBRRP0000100276 | JQ798884#   | -            | Sinan-gun,Korea    |
| <i>Gloydus brevicaudus</i>    | NIBRRP0000100265 | JQ798885#   | -            | Sinan-gun,Korea    |

|                             |                  |           |              |                     |
|-----------------------------|------------------|-----------|--------------|---------------------|
| <i>Gloydus brevicaudus</i>  | ZB-8             | KC841452# | -            | Yongzhou, Hunan     |
| <i>Gloydus brevicaudus</i>  | ZB-9             | KC841453# | -            | Yongzhou, Hunan     |
| <i>Gloydus intermedius</i>  | GP188            | KP403594  | BOLD:AAA8330 | Xinjiang            |
| <i>Gloydus intermedius</i>  | GP465            | KP403595  | BOLD:AAC6073 | Xinjiang            |
| <i>Gloydus intermedius</i>  | GP3072           | KP403596  | BOLD:ACV1406 | Yan'an, Shaanxi     |
| <i>Gloydus intermedius</i>  | GP3073           | KP403597  | BOLD:ACV1406 | Yan'an, Shaanxi     |
| <i>Gloydus lijianlii</i>    | GP1162           | KP403608  | BOLD:ACV0199 | Yantai, Shandong    |
| <i>Gloydus lijianlii</i>    | GP1163           | KP403609  | BOLD:ACV0199 | Yantai, Shandong    |
| <i>Gloydus lijianlii</i>    | GP1164           | KP403610  | BOLD:ACV0199 | Yantai, Shandong    |
| <i>Gloydus liupanensis</i>  | GP198            | KP403598  | BOLD:ACV0723 | Liupanshan, Ningxia |
| <i>Gloydus liupanensis</i>  | GP206            | KP403599  | BOLD:ACV0723 | Liupanshan, Ningxia |
| <i>Gloydus liupanensis</i>  | GP215            | KP403600  | BOLD:ACV0723 | Liupanshan, Ningxia |
| <i>Gloydus qinlingensis</i> | GP197            | KP403601  | BOLD:ACV0428 | Zhouzhi, Shaanxi    |
| <i>Gloydus qinlingensis</i> | GP3076           | KP403602  | BOLD:ACV0428 | Zhouzhi, Shaanxi    |
| <i>Gloydus qinlingensis</i> | GP3077           | KP403603  | BOLD:ACV0428 | Zhouzhi, Shaanxi    |
| <i>Gloydus qinlingensis</i> | GP3078           | KP403604  | BOLD:ACV0428 | Zhouzhi, Shaanxi    |
| <i>Gloydus saxatilis</i>    | GP190            | KP403605  | BOLD:AAA8329 | Huanren, Liaoning   |
| <i>Gloydus saxatilis</i>    | GP191            | KP403606  | BOLD:AAA8329 | Huanren, Liaoning   |
| <i>Gloydus saxatilis</i>    | GP629            | KP403607  | BOLD:AAA8329 | Kuandian, Liaoning  |
| <i>Gloydus saxatilis</i>    | GP1328           | KP403611  | BOLD:AAA8329 | Ji'an, Jilin        |
| <i>Gloydus saxatilis</i>    | GP1329           | KP403612  | BOLD:AAA8329 | Ji'an, Jilin        |
| <i>Gloydus saxatilis</i>    | GP1330           | KP403613  | BOLD:AAA8329 | Tonghua, Jilin      |
| <i>Gloydus saxatilis</i>    | GP1350           | KP403614  | BOLD:AAA8329 | Huanren, Liaoning   |
| <i>Gloydus saxatilis</i>    | NIBRRP0000100251 | JQ798881# | -            | Hwaseongsi, Korea   |
| <i>Gloydus saxatilis</i>    | NIBRRP0000100199 | JQ798882# | -            | Samcheok-si, Korea  |
| <i>Gloydus shedaoensis</i>  | GP1116           | KP403615  | BOLD:ACV0838 | Dalian, Liaoning    |
| <i>Gloydus shedaoensis</i>  | GP1119           | KP403616  | BOLD:ACV0838 | Dalian, Liaoning    |
| <i>Gloydus shedaoensis</i>  | GP1132           | KP403617  | BOLD:ACV0838 | Dalian, Liaoning    |
| <i>Gloydus strauchi</i>     | GP106            | KP403618  | BOLD:ACV0602 | Ruoergai, Sichuan   |

|                               |                  |           |              |                     |
|-------------------------------|------------------|-----------|--------------|---------------------|
| <i>Gloydus strauchi</i>       | GP175            | KP403619  | BOLD:ACV0983 | Heishui, Sichuan    |
| <i>Gloydus strauchi</i>       | GP2322           | KP403620  | BOLD:ACV0603 | Shiqu, Sichuan      |
| <i>Gloydus strauchi</i>       | GP2323           | KP403621  | BOLD:ACV0603 | Shiqu, Sichuan      |
| <i>Gloydus strauchi</i>       | GP2324           | KP403622  | BOLD:ACV0603 | Shiqu, Sichuan      |
| <i>Gloydus ussuriensis</i>    | GP192            | KP403623  | BOLD:AAA8331 | Huanren, Liaoning   |
| <i>Gloydus ussuriensis</i>    | GP194            | KP403624  | BOLD:AAA8331 | Huanren, Liaoning   |
| <i>Gloydus ussuriensis</i>    | GP1319           | KP403625  | BOLD:AAA8331 | Huanren, Liaoning   |
| <i>Gloydus ussuriensis</i>    | GP1326           | KP403626  | BOLD:AAA8331 | Ji'an, Jilin        |
| <i>Gloydus ussuriensis</i>    | GP1327           | KP403627  | BOLD:AAA8331 | Ji'an, Jilin        |
| <i>Gloydus ussuriensis</i>    | GP1331           | KP403628  | BOLD:AAA8331 | Tonghua, Jilin      |
| <i>Gloydus ussuriensis</i>    | GP1332           | KP403629  | BOLD:AAA8331 | Tonghua, Jilin      |
| <i>Gloydus ussurensis</i>     | GP1333           | KP403630  | BOLD:AAA8331 | Tonghua, Jilin      |
| <i>Gloydus ussurensis</i>     | NIBRRP0000100352 | JQ798886# | -            | Sacheon-si, Korea   |
| <i>Gloydus ussurensis</i>     | NIBRRP0000100367 | JQ798887# | -            | Incheon, Korea      |
| <i>Himalayophis tibetanus</i> | GP149            | KP403631  | BOLD:ACV0059 | Zhangmu, Xizang     |
| <i>Himalayophis tibetanus</i> | GP150            | KP403632  | BOLD:ACV0059 | Zhangmu, Xizang     |
| <i>Ovophis makazayazaya</i>   | GP21             | KP403633  | BOLD:ACU9983 | Huili, Sichuan      |
| <i>Ovophis makazayazaya</i>   | GP214            | KP403634  | BOLD:ACU9981 | Anxian, Sichuan     |
| <i>Ovophis makazayazaya</i>   | GP343            | KP403635  | BOLD:ACU9980 | Shimen, Hunan       |
| <i>Ovophis makazayazaya</i>   | GP1083           | KP403636  | BOLD:ACU9981 | Changning, Sichuan  |
| <i>Ovophis makazayazaya</i>   | GP3086           | KP403637  | BOLD:ACU9981 | Shiyan, Hubei       |
| <i>Ovophis tonkinensis</i>    | GP1632           | KP403638  | BOLD:ACV1715 | Maoming, Guangdong  |
| <i>Ovophis tonkinensis</i>    | GP2051           | KP403639  | BOLD:ACV1716 | Longzhou, Guangdong |
| <i>Ovophis tonkinensis</i>    | GP2140           | KP403640  | BOLD:ACV0860 | Diaoluoshan, Hainan |
| <i>Ovophis zayuensis</i>      | GP89             | KP403641  | BOLD:ACV0859 | Chayu, Xizang       |
| <i>Ovophis zayuensis</i>      | GP91             | KP403642  | BOLD:ACV0859 | Chayu, Xizang       |
| <i>Ovophis zayuensis</i>      | GP557            | KP403643  | BOLD:ACV0859 | Pailong, Xizang     |
| <i>Popeia popeiorum</i>       | GP3326           | KP403685  | BOLD:ACS7021 | Jinghong, Yunnan    |
| <i>Popeia popeiorum</i>       | GP3327           | KP403686  | BOLD:ACS7021 | Jinghong, Yunnan    |

|                                     |                                |           |              |                     |
|-------------------------------------|--------------------------------|-----------|--------------|---------------------|
| <i>Popeia popeiorum</i>             | GP3329                         | KP403687  | BOLD:ACS7021 | Jinghong, Yunnan    |
| <i>Popeia popeiorum</i>             | GP3330                         | KP403688  | BOLD:ACS7021 | Jinghong, Yunnan    |
| <i>Popeia popeiorum</i>             | GP3331                         | KP403689  | BOLD:ACS7021 | Jinghong, Yunnan    |
| <i>Popeia popeiorum</i>             | GP3332                         | KP403690  | BOLD:ACS7021 | Jinghong, Yunnan    |
| <i>Popeia popeiorum</i>             | GP3333                         | KP403691  | BOLD:ACS7021 | Jinghong, Yunnan    |
| <i>Popeia popeiorum</i>             | GP3334                         | KP403692  | BOLD:ACS7021 | Jinghong, Yunnan    |
| <i>Popeia popeiorum</i>             | GP3335                         | KP403693  | BOLD:ACS7021 | Jinghong, Yunnan    |
| <i>Popeia popeiorum</i>             | GP3336                         | KP403694  | BOLD:ACS7021 | Jinghong, Yunnan    |
| <i>Popeia popeiorum</i>             | KIZ01471                       | KP403695  | BOLD:ACS7021 | Mengla, Yunnan      |
| <i>Popeia popeiorum</i>             | KIZ01541                       | KP403696  | BOLD:ACS7021 | Mengla, Yunnan      |
| <i>Protobothrops cornutus</i>       | IEBR A2014.28/CB 2011.2        | KP403644  | BOLD:ACV0852 | Cao Bang, Vietnam   |
| <i>Protobothrops cornutus</i>       | IEBR A2014.31/PNKB<br>2011.300 | KP403645  | BOLD:ACV0853 | Quang Binh, Vietnam |
| <i>Protobothrops dabieshanensis</i> | GP2631                         | KP403646  | BOLD:ACU8513 | Yuexi, Anhui        |
| <i>Protobothrops himalayanus</i>    | GP3163                         | KP403647  | BOLD:ACV1404 | Jilong, Xizang      |
| <i>Protobothrops jerdonii</i>       | GP9                            | KP403648  | BOLD:ACV0340 | Anxian, Sichuan     |
| <i>Protobothrops jerdonii</i>       | GP12                           | KP403649  | BOLD:ACV1003 | Huili, Sichuan      |
| <i>Protobothrops jerdonii</i>       | GP13                           | KP403650  | BOLD:ACV1003 | Huili, Sichuan      |
| <i>Protobothrops jerdonii</i>       | GP345                          | KP403651  | BOLD:ACV0945 | Shimen, Hunan       |
| <i>Protobothrops jerdonii</i>       | GP346                          | KP403652  | BOLD:ACV0945 | Shimen, Hunan       |
| <i>Protobothrops jerdonii</i>       | GP853                          | KP403653  | BOLD:ACV0944 | Foping, Shaanxi     |
| <i>Protobothrops jerdonii</i>       | GP855                          | KP403654  | BOLD:ACV0944 | Foping, Shaanxi     |
| <i>Protobothrops jerdonii</i>       | GP1084                         | KP403655  | BOLD:ACU9909 | Henan               |
| <i>Protobothrops jerdonii</i>       | GP1085                         | KP403656  | BOLD:ACU9909 | Henan               |
| <i>Protobothrops jerdonii</i>       | ZL-PV-111111                   | JX233624# | -            | Hunan               |
| <i>Protobothrops kaulbacki</i>      | GP112                          | KP403657  | BOLD:ACV0904 | Motuo, Xizang       |
| <i>Protobothrops kaulbacki</i>      | GP550                          | KP403658  | BOLD:ACV0904 | Linzhi, Xizang      |
| <i>Protobothrops mangshanensis</i>  | GP17                           | KP403659  | BOLD:ACH4986 | Yizhang, Hunan      |
| <i>Protobothrops mangshanensis</i>  | H1                             | JX233619# | -            | Guangdong           |

|                                      |                          |           |              |                      |
|--------------------------------------|--------------------------|-----------|--------------|----------------------|
| <i>Protobothrops maolanensis</i>     | GP1883                   | KP403660  | BOLD:ACU8512 | Libo, Guizhou        |
| <i>Protobothrops maolanensis</i>     | GP1884                   | KP403661  | BOLD:ACU8512 | Libo, Guizhou        |
| <i>Protobothrops maolanensis</i>     | GP1902                   | KP403662  | BOLD:ACU8512 | Libo, Guizhou        |
| <i>Protobothrops maolanensis</i>     | GP1903                   | KP403663  | BOLD:ACU8512 | Libo, Guizhou        |
| <i>Protobothrops mucrosquamatus</i>  | GP29                     | KP403664  | BOLD:ACV1327 | Yibin, Sichuan       |
| <i>Protobothrops mucrosquamatus</i>  | GP31                     | KP403665  | BOLD:ACV1327 | Hongya, Sichuan      |
| <i>Protobothrops mucrosquamatus</i>  | GP32                     | KP403666  | BOLD:ACV1327 | Hongya, Sichuan      |
| <i>Protobothrops mucrosquamatus</i>  | GP134                    | KP403667  | BOLD:ACV1327 | Tongjiang, Sichuan   |
| <i>Protobothrops mucrosquamatus</i>  | GP136                    | KP403668  | BOLD:ACV1327 | Tongjiang, Sichuan   |
| <i>Protobothrops mucrosquamatus</i>  | GP402                    | KP403669  | BOLD:ACH9701 | Ruyuan, Guangdong    |
| <i>Protobothrops mucrosquamatus</i>  | GP997                    | KP403670  | BOLD:ACH9702 | Cenxi, Guangxi       |
| <i>Protobothrops mucrosquamatus</i>  | GP1043                   | KP403671  | BOLD:ACV1327 | Luxi, Hunan          |
| <i>Protobothrops mucrosquamatus</i>  | GP2472                   | KP403672  | BOLD:ACV1327 | Pingyang, Guizhou    |
| <i>Protobothrops mucrosquamatus</i>  | CH1                      | JX233625# | -            | Conghua, Guangdong   |
| <i>Protobothrops trungkhanhensis</i> | ZFMK 93774/CB 2012.53    | KP403673  | BOLD:ACV1573 | Vietnam              |
| <i>Protobothrops trungkhanhensis</i> | IEBR A2014.29/CB 2012.74 | KP403674  | BOLD:ACV1573 | Vietnam              |
| <i>Protobothrops xiangchengensis</i> | GP26                     | KP403675  | BOLD:ACV1483 | Jiulong, Sichuan     |
| <i>Protobothrops xiangchengensis</i> | GP27                     | KP403676  | BOLD:ACV1483 | Jiulong, Sichuan     |
| <i>Sinovipera sichuanensis</i>       | GP7                      | KP403677  | BOLD:ACV0419 | Hejiang, Sichuan     |
| <i>Sinovipera sichuanensis</i>       | GP2950                   | KP403678  | BOLD:ACV0419 | Jiangkou, Guizhou    |
| <i>Sinovipera sichuanensis</i>       | GP2952                   | KP403679  | BOLD:ACV0419 | Jiangkou, Guizhou    |
| <i>Trimeresurus albolabris</i>       | GP4                      | KP403571  | BOLD:ABZ0912 | Hainan               |
| <i>Trimeresurus albolabris</i>       | GP5                      | KP403572  | BOLD:ABZ0912 | Hainan               |
| <i>Trimeresurus albolabris</i>       | GP6                      | KP403573  | BOLD:ABZ0912 | Fujian               |
| <i>Trimeresurus albolabris</i>       | GP978                    | KP403574  | BOLD:ABZ0912 | Cenxi, Guangxi       |
| <i>Trimeresurus albolabris</i>       | GP979                    | KP403575  | BOLD:ABZ0912 | Cenxi, Guangxi       |
| <i>Trimeresurus albolabris</i>       | GP1591                   | KP403576  | BOLD:ABZ0912 | Zhanjiang, Guangdong |
| <i>Trimeresurus albolabris</i>       | GP1592                   | KP403577  | BOLD:ABZ0912 | Zhanjiang, Guangdong |
| <i>Trimeresurus albolabris</i>       | GP1895                   | KP403578  | BOLD:ABZ0912 | Qinzhou, Guangxi     |

|                                |           |           |              |                      |
|--------------------------------|-----------|-----------|--------------|----------------------|
| <i>Trimeresurus albolabris</i> | GP1896    | KP403579  | BOLD:ABZ0912 | Qinzhou, Guangxi     |
| <i>Trimeresurus albolabris</i> | H4        | JX233622# | -            | Zhongshan, Guangdong |
| <i>Trimeresurus albolabris</i> | H22       | KC171175# | -            | Guangzhou, Guangdong |
| <i>Trimeresurus albolabris</i> | ROM 30993 | KC291050# | -            | Hong Kong            |
| <i>Trimeresurus albolabris</i> | ROM 30994 | KC291059# | -            | Hong Kong            |
| <i>Trimeresurus albolabris</i> | ROM 30854 | KC291060# | -            | Vinh Phuc, Vietnam   |
| <i>Trimeresurus albolabris</i> | ROM 30177 | KC291061# | -            | Vinh Phuc, Vietnam   |
| <i>Trimeresurus albolabris</i> | ROM 35301 | KC291062# | -            | Hia Duong, Vietnam   |
| <i>Trimeresurus albolabris</i> | ROM 35304 | KC291063# | -            | Hai Duong, Vietnam   |
| <i>Trimeresurus albolabris</i> | ROM 35303 | KC291064# | -            | Hai Duong, Vietnam   |
| <i>Trimeresurus albolabris</i> | ROM 35299 | KC291065# | -            | Hai Duong, Vietnam   |
| <i>Trimeresurus albolabris</i> | ROM 35302 | KC291066# | -            | Hai Duong, Vietnam   |
| <i>Trimeresurus albolabris</i> | ROM 35300 | KC291067# | -            | Hai Duong, Vietnam   |
| <i>Trimeresurus albolabris</i> | ROM 37592 | KC291075# | -            | Kon Tum, Vietnam     |
| <i>Trimeresurus albolabris</i> | ROM 37595 | KC291077# | -            | Kon Tum, Vietnam     |
| <i>Trimeresurus albolabris</i> | ROM 39389 | KC291078# | -            | Lao Cai, Vietnam     |
| <i>Trimeresurus albolabris</i> | ROM 39393 | KC291082# | -            | Lao Cai, Vietnam     |
| <i>Trimeresurus albolabris</i> | ROM 35324 | KC291093# | -            | Cao Bang, Vietnam    |
| <i>Trimeresurus albolabris</i> | ROM 35323 | KC291094# | -            | Cao Bang, Vietnam    |
| <i>Trimeresurus albolabris</i> | ROM 18267 | KC291110# | -            | Vietnam              |
| <i>Trimeresurus albolabris</i> | ROM 30869 | KC291112# | -            | Vinh Phuc, Vietnam   |
| <i>Trimeresurus albolabris</i> | ROM 30856 | KC291113# | -            | Vinh Phuc, Vietnam   |
| <i>Trimeresurus albolabris</i> | ROM 30872 | KC291114# | -            | Vinh Phuc, Vietnam   |
| <i>Trimeresurus albolabris</i> | ROM 30867 | KC291115# | -            | Vinh Phuc, Vietnam   |
| <i>Trimeresurus albolabris</i> | ROM 30875 | KC291116# | -            | Vinh Phuc, Vietnam   |
| <i>Trimeresurus albolabris</i> | ROM 30864 | KC291117# | -            | Vinh Phuc, Vietnam   |
| <i>Trimeresurus albolabris</i> | ROM 30866 | KC291118# | -            | Vinh Phuc, Vietnam   |
| <i>Trimeresurus albolabris</i> | ROM 30871 | KC291119# | -            | Vinh Phuc, Vietnam   |
| <i>Trimeresurus albolabris</i> | ROM 30873 | KC291120# | -            | Vinh Phuc, Vietnam   |

|                                |           |           |              |                     |
|--------------------------------|-----------|-----------|--------------|---------------------|
| <i>Trimeresurus albolabris</i> | ROM 30861 | KC291121# | -            | Vinh Phuc, Vietnam  |
| <i>Trimeresurus albolabris</i> | ROM 30865 | KC291122# | -            | Vinh Phuc, Vietnam  |
| <i>Trimeresurus albolabris</i> | ROM 30862 | KC291123# | -            | Vinh Phuc, Vietnam  |
| <i>Trimeresurus albolabris</i> | ROM 30863 | KC291124# | -            | Vinh Phuc, Vietnam  |
| <i>Vipera berus</i>            | GP1389    | KP403680  | BOLD:AAW7158 | Jilin               |
| <i>Vipera berus</i>            | GP1390    | KP403681  | BOLD:AAW7158 | Jilin               |
| <i>Vipera berus</i>            | NRM:6198  | KJ128676# | -            | Sweden              |
| <i>Vipera renardi</i>          | GP634     | KP403684  | BOLD:ACV0623 | Nileike, Xinjiang   |
| <i>Vipera renardi</i>          | -         | KC122716# | -            | Kazakhstan          |
| <i>Vipera renardi</i>          | -         | KC122717# | -            | Kazakhstan          |
| <i>Vipera renardi</i>          | -         | KC122735# | -            | Kazakhstan          |
| <i>Vipera renardi</i>          | -         | KC122751# | -            | Crimea, Ukraine     |
| <i>Vipera renardi</i>          | SNP 478   | KC122752# | -            | Astrakhan, Russia   |
| <i>Vipera renardi</i>          | -         | KC122753# | -            | Astrakhan, Russia   |
| <i>Vipera renardi</i>          | -         | KC122754# | -            | Crimea, Ukraine     |
| <i>Vipera renardi</i>          | -         | KC122755# | -            | Kherson, Ukraine    |
| <i>Vipera renardi</i>          | -         | KC122756# | -            | Eastern Kazakhstan  |
| <i>Vipera renardi</i>          | -         | KC122757# | -            | Eastern Kazakhstan  |
| <i>Vipera renardi</i>          | -         | KC122758# | -            | Southern Kazakhstan |
| <i>Vipera renardi</i>          | -         | KC122759# | -            | Southern Kazakhstan |
| <i>Vipera renardi</i>          | -         | KC122760# | -            | Adygea, Russia      |
| <i>Vipera renardi</i>          | SNP 782-2 | KC122761# | -            | Kalmykia, Russia    |
| <i>Viridovipera gumprechti</i> | GP51      | KP403697  | BOLD:ACV0260 | Jingdong, Yunnan    |
| <i>Viridovipera gumprechti</i> | GP3271    | KP403698  | BOLD:ACS2952 | Daweishan, Yunnan   |
| <i>Viridovipera gumprechti</i> | GP3272    | KP403699  | BOLD:ACS2952 | Daweishan, Yunnan   |
| <i>Viridovipera gumprechti</i> | GP3273    | KP403700  | BOLD:ACS2952 | Daweishan, Yunnan   |
| <i>Viridovipera gumprechti</i> | GP3274    | KP403701  | BOLD:ACS2952 | Daweishan, Yunnan   |
| <i>Viridovipera gumprechti</i> | GP3275    | KP403702  | BOLD:ACS2952 | Daweishan, Yunnan   |
| <i>Viridovipera gumprechti</i> | GP3276    | KP403703  | BOLD:ACS2952 | Daweishan, Yunnan   |



|                                 |           |           |              |                      |
|---------------------------------|-----------|-----------|--------------|----------------------|
| <i>Viridovipera gumprechtii</i> | GP3286    | KP403704  | BOLD:ACS2952 | Daweishan, Yunnan    |
| <i>Viridovipera gumprechtii</i> | H17       | KC171170# | -            | Honghe, Yunnan       |
| <i>Viridovipera gumprechtii</i> | H19       | KC171172# | -            | Honghe, Yunnan       |
| <i>Viridovipera gumprechtii</i> | KIZ03525  | KP403705  | BOLD:ACS7018 | Jingdong, Yunnan     |
| <i>Viridovipera gumprechtii</i> | KIZ05089  | KP403706  | BOLD:ACV0260 | Baoshan, Yunnan      |
| <i>Viridovipera stejnegeri</i>  | GP44      | KP403707  | BOLD:ACS2953 | Diaoluoshan, Hainan  |
| <i>Viridovipera stejnegeri</i>  | GP45      | KP403708  | BOLD:ACS2953 | Diaoluoshan, Hainan  |
| <i>Viridovipera stejnegeri</i>  | GP186     | KP403709  | BOLD:ACV0257 | Guilin, Guangxi      |
| <i>Viridovipera stejnegeri</i>  | GP230     | KP403710  | BOLD:ACS2954 | Hejiang, Sichuan     |
| <i>Viridovipera stejnegeri</i>  | GP231     | KP403711  | BOLD:ACS2954 | Hejiang, Sichuan     |
| <i>Viridovipera stejnegeri</i>  | GP342     | KP403712  | BOLD:ACS2954 | Shimen, Hunan        |
| <i>Viridovipera stejnegeri</i>  | GP364     | KP403713  | BOLD:ACV1548 | Nanling, Guangdong   |
| <i>Viridovipera stejnegeri</i>  | GP471     | KP403714  | BOLD:ACV1547 | Qimen, Anhui         |
| <i>Viridovipera stejnegeri</i>  | GP472     | KP403715  | BOLD:ACV1547 | Qimen, Anhui         |
| <i>Viridovipera stejnegeri</i>  | GP3300    | KP403716  | BOLD:ACS2954 | Kaiyuan, Yunnan      |
| <i>Viridovipera stejnegeri</i>  | GP3301    | KP403717  | BOLD:ACS2954 | Kaiyuan, Yunnan      |
| <i>Viridovipera stejnegeri</i>  | GP3302    | KP403718  | BOLD:ACS2954 | Kaiyuan, Yunnan      |
| <i>Viridovipera stejnegeri</i>  | ZS-13     | JX233623# | -            | Zhongshan, Guangdong |
| <i>Viridovipera stejnegeri</i>  | ROM 31133 | KC291052# | -            | Gia Lai, Vietnam     |
| <i>Viridovipera stejnegeri</i>  | ROM 30954 | KC291053# | -            | Nghe An, Vietnam     |
| <i>Viridovipera stejnegeri</i>  | ROM 30955 | KC291054# | -            | Nghe An, Vietnam     |
| <i>Viridovipera stejnegeri</i>  | ROM 30956 | KC291055# | -            | Nghe An, Vietnam     |
| <i>Viridovipera stejnegeri</i>  | ROM 30951 | KC291056# | -            | Nghe An, Vietnam     |
| <i>Viridovipera stejnegeri</i>  | ROM 30952 | KC291057# | -            | Nghe An, Vietnam     |
| <i>Viridovipera stejnegeri</i>  | ROM 30953 | KC291058# | -            | Nghe An, Vietnam     |
| <i>Viridovipera stejnegeri</i>  | H15       | KC171168# | -            | Leishan, Guizhou     |
| <i>Viridovipera stejnegeri</i>  | ROM 37590 | KC291071# | -            | Kon Tum, Vietnam     |
| <i>Viridovipera stejnegeri</i>  | ROM 37591 | KC291072# | -            | Kon Tum, Vietnam     |
| <i>Viridovipera stejnegeri</i>  | ROM 37596 | KC291073# | -            | Kon Tum, Vietnam     |

|                                 |           |           |              |                  |
|---------------------------------|-----------|-----------|--------------|------------------|
| <i>Viridovipera stejnegeri</i>  | ROM 37594 | KC291074# | -            | Kon Tum, Vietnam |
| <i>Viridovipera stejnegeri</i>  | ROM 37589 | KC291076# | -            | Kon Tum, Vietnam |
| <i>Viridovipera stejnegeri</i>  | ROM 34567 | KC291084# | -            | Gia Lai, Vietnam |
| <i>Viridovipera stejnegeri</i>  | ROM 27501 | KC291086# | -            | Kon Tum, Vietnam |
| <i>Viridovipera stejnegeri</i>  | ROM 34667 | KC291088# | -            | Gia Lai, Vietnam |
| <i>Viridovipera stejnegeri</i>  | ROM 34568 | KC291089# | -            | Gia Lai, Vietnam |
| <i>Viridovipera stejnegeri</i>  | ROM 34565 | KC291090# | -            | Gia Lai, Vietnam |
| <i>Viridovipera stejnegeri</i>  | ROM 34566 | KC291091# | -            | Gia Lai, Vietnam |
| <i>Viridovipera stejnegeri</i>  | ROM 34554 | KC291099# | -            | Gia Lai, Vietnam |
| <i>Viridovipera stejnegeri</i>  | ROM 30790 | KC291125# | -            | Gia Lai, Vietnam |
| <i>Viridovipera stejnegeri</i>  | ROM 30791 | KC291126# | -            | Gia Lai, Vietnam |
| <i>Viridovipera yunnanensis</i> | GP 37     | KP403719  | BOLD:ACV0801 | Huili, Sichuan   |
| <i>Viridovipera yunnanensis</i> | GP 38     | KP403720  | BOLD:ACV0801 | Huili, Sichuan   |
